# Supplementary material for: Fetal and adult human oligodendrocyte progenitor cell isolates myelinate the congenitally dysmyelinated brain
Source: Springer Nature journal article supplement (doi:10.1038/nm974), 2003-12-21
Supplement: 41591_2004_BFnm974_MOESM2_ESM.pdf [file 41591_2004_BFnm974_MOESM2_ESM.pdf]

supplemental figure 2

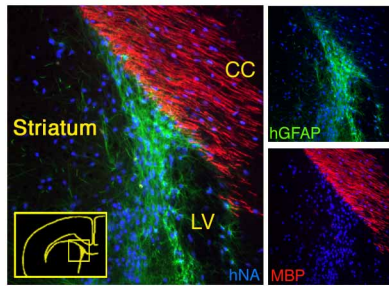

## Supplementary Figure 2

### OPCs were recruited as oligodendrocytes or astrocytes in a context-dependent manner

In the presumptive white matter, implanted OPCs typically matured as either MBP<sup>+</sup> myelinogenic oligodendrocytes in the presumptive white matter, or less so as GFAP<sup>+</sup> astrocytes. In contrast, in the recipient cortex and subcortical gray matter, donor cells gave rise solely to GFAP-defined astrocytes. **A**, as in **fig. 2F**, shows the striatocallosal border of a shiverer brain, 3 months after perinatal engraftment with human fetal OPCs (hNA in *blue*). Donor-derived MBP (*red*) expression is evident in the corpus callosum, while donor-derived GFAP<sup>+</sup> (*green*) astrocytes predominate on the striatal side. Here, in **B-D** the individual color splits reveal the sharp borders between white matter-associated MBP<sup>+</sup> oligodendrocytes and striatal GFAP<sup>+</sup> astrocytes, both derived from a common injection of nominally homogeneous fetal OPCs.

Scale = 200  $\mu$ m.
